# Supplementary material
Source: PubMed Central journal article supplement (PMC4187747)
Supplement: JCM.01653-14_zjm999093743so1.pdf [file JCM.01653-14_zjm999093743so1.pdf]

A.

FDLV 1 MIRTRIIYKPTYTTTTPTCHTPIKMEEDPREKMHQPQSMWRLVRLRAQRLLSYSESTDLDSTREFLEDVSKS  
 AnaPV (1110RN043) 1 ----- .V . . . R . . . . . ND . . . . . AI . R .  
 AnaPV (1110RN047) 1 ----- .V . . . R . . . . . ND . . . . . AI . R .  
 AnaPV (1201RN001) 1 ----- .V . . . R . . . . . ND . . . . . AI . R .  
 AnaPV (1201RN003) 1 ----- .V . . . R . . . . . ND . . . . . AI . R .  
 AnaPV (1203RN009) 1 ----- .V . . . R . . . . . ND . . . . . AI . R .  
 Biti-CA98 1 ---MYT . . SVHI . A . SS . . . S . . . V . . . R . Y . . . . . ND . . . . . I . R .  
 Dasy-GER00 1 ----- .V . . . R . Y . . . . . ND . . . . . I . R .  
 Xeno-USA99 1 ----- .V . L . . R . Y . . . . . ND . . . . . I . . . . .  
 Gono-GER85 1 . . N . HTS . T . H . . AKS . R . . . . V . . V . L . . . . . K . . . . D . . . . .  
 PanGut-GER09 1 ----- . I . . . . . A . . . . . I . G .  
 HoBuc-HUN09 1 ----- . I . . . . R . . . . . M . . . . . D . A . . . . . I . G .  
 Orth-GER05 1 ----- . A . MK . S . . . . . S . RK . . . . ND . A . P . . K . . . . I . R .  
 Igu-GER00 1 ----- . T . MK . A . . . . . S . RK . . . . ND . A . P . . K . . . . I . E .

FDLV 71 VVVLFNDRGMSSISQWRTECAARRLGNLSKFAWDAVTKGRMDPCRLAFKVMTELGNDAIRAEILTVVW  
 AnaPV (1110RN043) 47 . . . . . TP . H . . . . . E . . . . . VI . R . . . . . I . . . . .  
 AnaPV (1110RN047) 47 . . . . . TP . H . . . . . E . . . . . VI . R . . . . . I . . . . .  
 AnaPV (1201RN001) 47 . . . . . TP . H . . . . . E . . . . . VI . R . . . . . I . . . . .  
 AnaPV (1201RN003) 47 . . . . . TP . H . . . . . E . . . . . VI . R . . . . . I . . . . .  
 AnaPV (1203RN009) 47 . . . . . TP . H . . . . . E . . . . . VI . R . . . . . I . . . . .  
 Biti-CA98 68 . . I . . . . . TP . H . . . . . E . . . . . IIR . . . . . T . . . . .  
 Dasy-GER00 47 . . I . . . . . TP . H . . . . . E . . . . . IIR . . . . . T . . . . .  
 Xeno-USA99 47 . . . . . H . . . . . E . . . . . I . . . . . V . . . . . T . . . . .  
 Gono-GER85 71 . . . . . H . . . . . V . . . . . K . . . . .  
 PanGut-GER09 47 . . . . . IN . MK . RH . . . . . E . . . . . I . . . . . SMI . . V . . MI . .  
 HoBuc-HUN09 47 . . . . . AA . MI . QH . R . . . . . K . . . . . NAIV . V . . MI . .  
 Orth-GER05 47 M . . . . . VN . TI . QH . . . . . K . . . . . K . . R . . . . . S . MIV . V . . I .  
 Igu-GER00 47 M . . . . . VN . TI . QH . G . . . . . K . . . . . K . . R . . . . . S . MIV . V . . I .

FDLV 141 LITGWSTIPRTLHKDLWSSAIYRRLSL-  
 AnaPV (1110RN043) 117 . . . . . S . . Q . . . . . -  
 AnaPV (1110RN047) 117 . . . . . S . . Q . . . . . -  
 AnaPV (1201RN001) 117 . . . . . S . . Q . . . . . -  
 AnaPV (1201RN003) 117 . . . . . S . . Q . . . . . -  
 AnaPV (1203RN009) 117 . . . . . S . . Q . . . . . -  
 Biti-CA98 138 . . . . . S . . Q . . . . . -  
 Dasy-GER00 117 . . . . . S . . Q . . . . . -  
 Xeno-USA99 117 . . . . . S . . Q . . . . . -  
 Gono-GER85 141 . . . . . T . . . . . -  
 PanGut-GER09 117 . . . . . S . . K . . N . . . . . K . . E  
 HoBuc-HUN09 117 . . . . . S . . KN . . N . . . . . -  
 Orth-GER05 117 . . . . . S . . KG . . N . . R . . S . . . . P--  
 Igu-GER00 117 . . . . . S . . KG . . N . . R . . S . . . . P--

B.

FDLV 1 -----MVMAIPQHLHRTTPSRAMLIKSRNLAKRSRTKRRNLNRCNSRIGAKSKATLQ---- 53  
 AnaPV (1110RN043) 1 -----M . VVLP . PPH . . . . IR . R . . DPVT----- 26  
 AnaPV (1110RN047) 1 -----M . VVLP . PPH . . . . IR . R . . DPVT----- 26  
 AnaPV (1201RN001) 1 -----M . VVLP . PPH . . . . IR . R . . DPVT----- 26  
 AnaPV (1201RN003) 1 -----M . VVLP . PPH . . . . IR . R . . DPVT----- 26  
 AnaPV (1203RN009) 1 -----M . VVLP . PPH . . . . IR . R . . DPVT----- 26  
 HeV 1 MDLGEEIISQNLLEVMISW . A . . FT . RTT . MKISW . MRMSLPKAQVRLSLTLLLRMTMI . STRRK 65

**FIG S1** Multiple alignments of (A) U protein and (B) putative SB protein in the genomes of FDLV, AnaPV and other reptilian paramyxoviruses. Biti-CA98, Reptilian paramyxovirus (AAS45836.1); Dasy-GER00, Snake paramyxovirus (ACT63842.1); Xeno-USA99, Lizard paramyxovirus (ACT63860.1); Gono-GER85 Reptilian paramyxovirus (AAS45835.1); PanGut-GER09 Snake paramyxovirus (ADT91317.1); HoBuc-HUN09, Snake paramyxovirus (AFQ32570.1); Orth-GER05, Snake paramyxovirus (ACT63852.1); Igu-GER00, Lizard paramyxovirus (ACT63854.1).

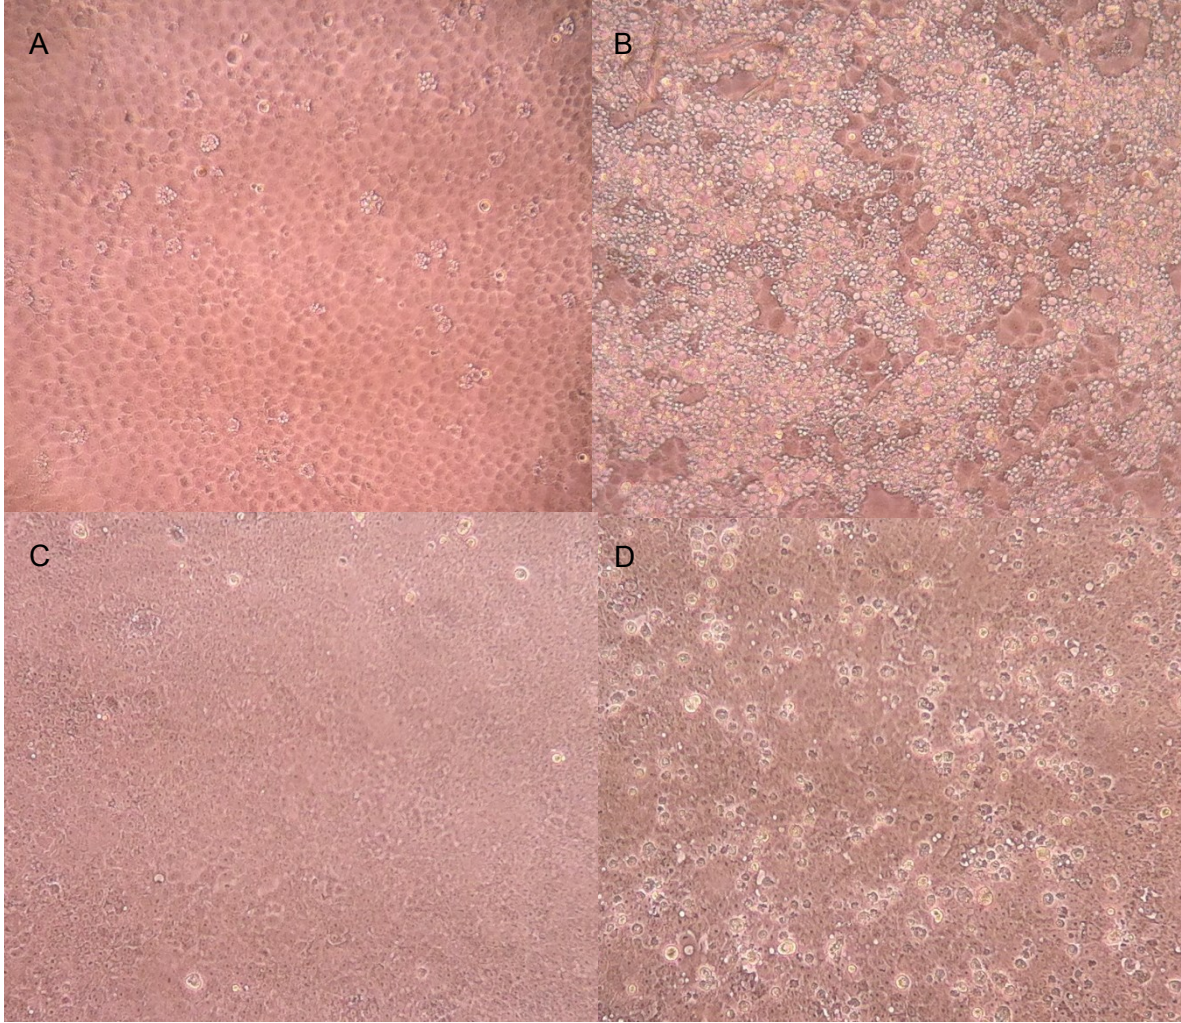

**FIG S2** Panel A, Normal RK13 cells. Panel B, CPEs of AnaPV on RK13 cells. Panel C, Normal Vero cells. Panel D, CPEs of AnaPV on Vero cells.

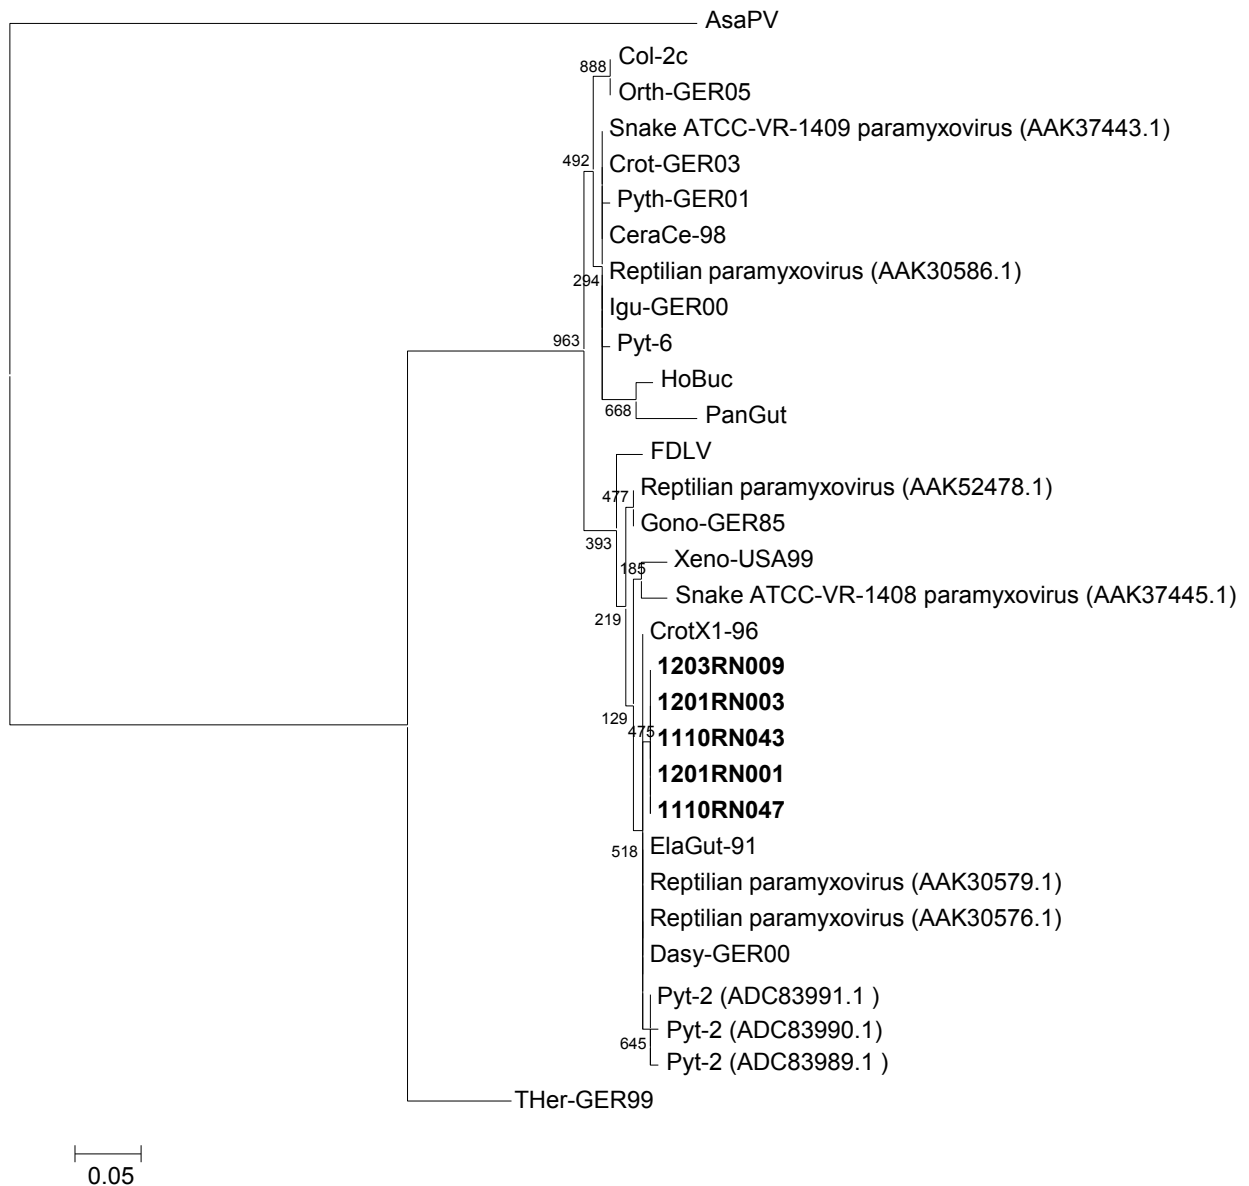

**FIG S3** Phylogenetic analysis of amino acid sequences of partial L protein of AnaPV and other snake and reptilian paramyxoviruses. The trees were constructed by maximum likelihood method with bootstrap values calculated from 1,000 trees and rooted on midpoint. The scale bars indicates the branch length that corresponds to 0.05 substitutions per site. Five strains from AnaPV were named as 1201RN001, 1110RN043, 1110RN047, 1201RN003, and 1203RN009. AsaPV, Atlantic salmon paramyxovirus strain ASPV-Ro (EF646380.1); HoBuc-HUN09, Snake paramyxovirus (AFQ32572.1); PanGut-GER09, Snake paramyxovirus

(ADT91314.1); Col-2c, Snake paramyxovirus(ADC83992.1); Pyt-6, Snake paramyxovirus (ADC83993.1); Dasy-GER00, Snake paramyxovirus (ACT63842.1); Croc-GER03, Snake paramyxovirus (ACT63840.1); Orth-GER05, Snake paramyxovirus (ACT63845.1); Pyth-GER01, Snake paramyxovirus (ACT63841.1); THer-GER99, Tortoise paramyxovirus (ACT63844.1); Igu-GER00, Lizard paramyxovirus (ACT63846.1); Xeno-USA99, Lizard paramyxovirus (ACT63843.1); ElaGut-91, Reptilian paramyxovirus (AF349408.1); Gono-GER85, Reptilian paramyxovirus (AAS45835.1); CrocX1-96, Reptilian paramyxovirus (AF349405.1); CeraCe-98, Reptilian paramyxovirus (AF351137.1)

**TABLE S1** Replication of AnaPV in 27 cell lines of different origins

| Cell line                           |              |                                                | Viral load, log <sub>10</sub> copies/ml, mean±SD |           |          |           |          |           |          |  |
|-------------------------------------|--------------|------------------------------------------------|--------------------------------------------------|-----------|----------|-----------|----------|-----------|----------|--|
| Organism and anatomic site          | Abbreviation | Source                                         | Day 0                                            | Day 1     | <i>P</i> | Day 3     | <i>P</i> | Day 5     | <i>P</i> |  |
| Human                               |              |                                                |                                                  |           |          |           |          |           |          |  |
| Respiratory tract                   |              |                                                |                                                  |           |          |           |          |           |          |  |
| Embryonic lung fibroblasts          | HFL          | In-house development                           | 5.81±0.01                                        | 7.95±0.01 | <0.001   | 8.46±0.14 | 0.023    | 8.82±0.05 | 0.007    |  |
| Lung adenocarcinoma                 | Calu-3       | ATCC no. HTB-55                                | 5.49±0.02                                        | 7.82±0.00 | 0.004    | 7.87±0.02 | <0.001   | 8.22±0.05 | 0.002    |  |
| Lung adenocarcinoma                 | A549         | ATCC no. CCL-185                               | 6.12±0.04                                        | 8.00±0.09 | 0.010    | 8.10±0.03 | <0.001   | 8.29±0.00 | 0.007    |  |
| Laryngeal epidermoid carcinoma      | Hep-2        | ATCC no. CCL-23                                | 6.16±0.03                                        | 8.31±0.07 | 0.004    | 8.73±0.03 | <0.001   | 8.91±0.09 | 0.006    |  |
| Gastrointestinal tract              |              |                                                |                                                  |           |          |           |          |           |          |  |
| Colorectal adenocarcinoma           | Caco-2       | ATCC no. HTB-37                                | 6.20±0.15                                        | 8.20±0.02 | 0.017    | 9.73±0.10 | <0.001   | 9.98±0.03 | 0.007    |  |
| Ileocecal colorectal adenocarcinoma | HRT-18G      | ATCC no. CRL-11663                             | 6.30±0.15                                        | 7.98±0.01 | 0.040    | 8.70±0.04 | 0.02     | 9.13±0.06 | 0.011    |  |
| Liver                               |              |                                                |                                                  |           |          |           |          |           |          |  |
| Hepatocellular carcinoma            | Huh-7        | JCRB0403, JCRB cell bank of Okayama University | 6.45±0.01                                        | 7.92±0.01 | <0.001   | 8.63±0.08 | 0.015    | 9.38±0.07 | 0.010    |  |
| Genitourinary tract                 |              |                                                |                                                  |           |          |           |          |           |          |  |
| Cervical adenocarcinoma             | HeLa         | ATCC no. CCL-2.2                               | 6.60±0.17                                        | 8.35±0.01 | 0.043    | 9.27±0.06 | 0.015    | 9.48±0.15 | 0.003    |  |
| Fetal kidney                        | HEK          | In-house development                           | 6.88±0.03                                        | 8.54±0.18 | 0.041    | 9.11±0.36 | 0.070    | 9.39±0.55 | 0.100    |  |
| Neuromuscular cells                 |              |                                                |                                                  |           |          |           |          |           |          |  |
| Neuron-committed teratocarcinoma    | NT2          | ATCC no. CRL-1973                              | 6.56±0.10                                        | 8.60±0.06 | 0.004    | 8.88±0.03 | 0.012    | 9.44±0.04 | 0.006    |  |
| Rhabdomyosarcoma                    | RD           | ATCC no. CCL-136                               | 5.73±0.05                                        | 7.85±0.05 | <0.001   | 8.38±0.09 | 0.004    | 8.85±0.00 | 0.007    |  |
| Central nervous system              | SF268        | Kindly provided by Prof. S. R. Shih            | 6.70±0.03                                        | 8.27±0.01 | 0.003    | 9.25±0.04 | <0.001   | 9.41±0.01 | 0.004    |  |
| Immune cell                         |              |                                                |                                                  |           |          |           |          |           |          |  |
| Malignant histiocytoma              | His-1        | In-house development                           | 6.50±0.05                                        | 8.25±0.01 | 0.012    | 8.98±0.00 | 0.009    | 9.21±0.01 | 0.006    |  |
| Non-human                           |              |                                                |                                                  |           |          |           |          |           |          |  |
| Mammals                             |              |                                                |                                                  |           |          |           |          |           |          |  |
| Madin-Darby canine kidney           | MDCK         | ATCC no. CCL-34                                | 5.67±0.06                                        | 8.12±0.02 | 0.006    | 8.78±0.03 | 0.002    | 9.06±0.04 | <0.001   |  |

|                                                   |         |                    |           |           |        |           |        |           |        |
|---------------------------------------------------|---------|--------------------|-----------|-----------|--------|-----------|--------|-----------|--------|
| Bovine kidney                                     | MDBK    | ATCC no. CCL-22    | 5.93±0.00 | 8.39±0.01 | <0.001 | 9.28±0.01 | <0.001 | 9.71±0.10 | 0.012  |
| Rabbit kidney                                     | RK13    | ATCC no. CCL-37    | 6.26±0.02 | 8.14±0.01 | <0.001 | 8.22±0.04 | 0.002  | 8.14±0.02 | <0.001 |
| Primary mouse embryonic fibroblasts               | 3T3     | ATCC no. CCL-92    | 5.84±0.02 | 8.31±0.00 | 0.004  | 8.59±0.03 | <0.001 | 8.73±0.03 | <0.001 |
| Camel skin                                        | Dubca   | ATCC no. CRL-2276  | 6.31±0.12 | 7.74±0.15 | 0.010  | 7.77±0.15 | 0.009  | 7.86±0.01 | 0.033  |
| Rhesus monkey kidney                              | LLC-MK2 | ATCC no. CCL-7     | 6.14±0.07 | 7.61±0.07 | 0.002  | 7.96±0.02 | 0.009  | 8.59±0.17 | 0.012  |
| African green monkey kidney                       | Vero    | ATCC no. CCL-81    | 5.97±0.11 | 7.71±0.02 | 0.024  | 8.39±0.02 | 0.015  | 9.00±0.01 | 0.015  |
| African green monkey kidney<br>(clone of Vero-76) | VeroE6  | ATCC no. CRL-1586  | 5.78±0.08 | 7.72±0.03 | 0.009  | 8.66±0.02 | 0.009  | 9.19±0.02 | 0.008  |
| Feline kidney                                     | CRFK    | ATCC no. CCL-94    | 5.74±0.02 | 7.70±0.04 | 0.003  | 7.90±0.04 | 0.003  | 7.88±0.00 | 0.003  |
| Porcine kidney                                    | PK-15   | ATCC no. CCL-33    | 6.67±0.05 | 8.21±0.01 | 0.007  | 8.45±0.01 | 0.008  | 8.56±0.00 | 0.011  |
| <i>Rattus norvegicus</i> kidney                   | RK3E    | ATCC no. CRL-1895  | 6.72±0.05 | 8.37±0.08 | 0.004  | 8.53±0.05 | <0.001 | 8.47±0.02 | 0.004  |
| <i>Rattus norvegicus</i> kidney                   | RMC     | ATCC no. CRL-2573  | 5.80±0.09 | 7.93±0.04 | 0.009  | 8.06±0.00 | 0.018  | 8.11±0.17 | 0.009  |
| Chicken                                           |         |                    |           |           |        |           |        |           |        |
| Chicken fibroblasts                               | DF-1    | ATCC no. CRL-12203 | 6.73±0.16 | 8.17±0.01 | 0.033  | 8.56±0.06 | 0.015  | 8.75±0.07 | 0.010  |
| Insect                                            |         |                    |           |           |        |           |        |           |        |
| <i>Aedes albopictus</i>                           | C6/36   | ATCC no. CRL-1660  | 6.51±0.15 | 7.65±0.02 | 0.056  | 7.80±0.01 | 0.052  | 7.71±0.04 | 0.045  |

**TABLE S2** Comparison of genome characteristics between AnaPV and other members in *Paramyxovirinae*

| Genus                    | Virus  | Genome features |             | Pairwise percent amino acid identities of AnaPV proteins with analogous proteins in <i>Paramyxovirinae</i> |      |      |      |      |      |      |      |      |
|--------------------------|--------|-----------------|-------------|------------------------------------------------------------------------------------------------------------|------|------|------|------|------|------|------|------|
|                          |        | genome size     | G+C content | N                                                                                                          | U    | P    | V    | I    | M    | F    | HN   | L    |
| <i>Ferlavirus</i>        | FDLV   | 15,378 bp       | 43.13%      | 97.2                                                                                                       | 75.4 | 87.2 | 83.7 | 79.4 | 97.4 | 95.6 | 93.3 | 96.8 |
| <i>Aquaparamyxovirus</i> | AsaPV  | 16,965 bp       | 45.88%      | 18.5                                                                                                       | NA   | 17.8 | 18.6 | NA   | 35.8 | 40.8 | 38.6 | 43.9 |
| <i>Morbillivirus</i>     | CDV    | 15,690 bp       | 42.98%      | 27.9                                                                                                       | NA   | 19.5 | NA   | NA   | 36.3 | 23.9 | 19.0 | 39.7 |
|                          | MeV    | 15,894 bp       | 47.43%      | 26.7                                                                                                       | NA   | 20.0 | 41.8 | NA   | 34.2 | 32.0 | 19.2 | 39.5 |
|                          | PPRV   | 15,948 bp       | 48.10%      | 28.0                                                                                                       | NA   | 20.3 | 34.2 | NA   | 35.2 | 28.6 | 18.1 | 40.0 |
| <i>Respirovirus</i>      | BPIV-3 | 15,456 bp       | 35.96%      | 26.7                                                                                                       | NA   | 18.6 | NA   | NA   | 36.1 | 30.8 | 36.2 | 41.9 |
|                          | HPIV-1 | 15,600 bp       | 37.24%      | 25.4                                                                                                       | NA   | 18.0 | NA   | NA   | 37.4 | 29.8 | 39.1 | 43.6 |
|                          | HPIV-3 | 15,462 bp       | 34.52%      | 25.6                                                                                                       | NA   | 17.0 | NA   | NA   | 35.3 | 31.3 | 36.4 | 42.4 |
|                          | SeV    | 15,384 bp       | 46.09%      | 26.3                                                                                                       | NA   | 18.2 | 30.6 | NA   | 36.6 | 30.2 | 40.3 | 43.4 |
| <i>Rubulavirus</i>       | MuV    | 15,384 bp       | 42.49%      | 22.7                                                                                                       | NA   | 18.1 | 41.0 | 20.0 | 21.6 | 26.6 | 28.4 | 31.1 |
|                          | HPIV4a | 17,052 bp       | 36.23%      | 22.8                                                                                                       | NA   | 19.4 | 22.4 | NA   | 23.4 | 26.7 | 28.5 | 29.5 |
|                          | HPIV4b | 17,304 bp       | 36.40%      | 23.7                                                                                                       | NA   | 19.3 | 21.4 | NA   | 23.2 | 26.5 | 29.3 | 29.5 |
|                          | PoRV   | 15,180 bp       | 46.70%      | 24.4                                                                                                       | NA   | 19.6 | 39.8 | NA   | 19.7 | 27.7 | 27.8 | 30.4 |
| <i>Henipavirus</i>       | HeV    | 15,882 bp       | 48.00%      | 29.7                                                                                                       | NA   | 15.4 | 27.4 | NA   | 34.9 | 28.5 | 21.8 | 40.0 |
|                          | NiV    | 18,246 bp       | 38.17%      | 28.9                                                                                                       | NA   | 17.1 | 27.5 | NA   | 36.3 | 28.5 | 22.5 | 40.7 |
|                          | CedPV  | 18,162 bp       | 37.20%      | 27.6                                                                                                       | NA   | 16.5 | NA   | NA   | 33.6 | 29.2 | 21.1 | 36.1 |
| <i>Avulavirus</i>        | APMV6  | 16,236 bp       | 46.35%      | 23.6                                                                                                       | NA   | 20.5 | NA   | NA   | 22.6 | 28.5 | 24.0 | 29.1 |
|                          | NDV    | 15,186 bp       | 46.18%      | 25.5                                                                                                       | NA   | 16.3 | 24.7 | NA   | 19.7 | 25.0 | 29.0 | 28.2 |
|                          | GooPV  | 15,192 bp       | 46.55%      | 27.1                                                                                                       | NA   | 19.2 | NA   | NA   | 21.7 | 24.7 | 27.9 | 28.6 |
| <i>Unclassified</i>      | BeiPV  | 19,212 bp       | 42.78%      | 26.7                                                                                                       | NA   | 18.4 | 36.0 | NA   | 39.2 | 35.3 | 25.5 | 40.7 |
| <i>Paramyxovirinae</i>   | JPV    | 18,954 bp       | 40.95%      | 27.3                                                                                                       | NA   | 20.8 | 38.4 | NA   | 39.5 | 36.1 | 26.9 | 40.6 |
|                          | TlmpV  | 19,152 bp       | 39.62%      | 27.7                                                                                                       | NA   | 18.9 | 34.6 | NA   | 37.5 | 34.5 | 17.7 | 42.4 |

NA, not available
